# Supplementary material
Source: PubMed Central journal article supplement (PMC3584956)
Supplement: supp_bhs007_SupplementalTable1.pdf [file supp_bhs007_SupplementalTable1.pdf]

**Supplemental Table 1 – ALE Results by Content**

|                | x   | y   | z        | ALE      | # Vox  | BA                    | Region                    |
|----------------|-----|-----|----------|----------|--------|-----------------------|---------------------------|
| <i>Verbal</i>  |     |     |          |          |        |                       |                           |
| Frontal        | -32 | 0   | 58       | 0.023904 | 472    | 6, 8                  | left caudal SFS           |
|                | -52 | 2   | 42       | 0.022406 |        | 6                     | left preCG                |
|                | -40 | -2  | 46       | 0.016399 |        | 6                     | left preCG                |
|                | -42 | 28  | 26       | 0.016235 | 378    | 45, 46                | left IFS/IFG - tria       |
|                | -54 | 14  | 22       | 0.014505 |        | 44                    | left IFG - oper           |
|                | -50 | 18  | 28       | 0.013816 |        | 44                    | left IFS/IFG - oper       |
|                | -40 | 16  | 28       | 0.012095 |        | 44                    | left IFS/IFG - oper       |
|                | 48  | 4   | 38       | 0.036136 | 259    | 6, 44, 9              | right IFJ                 |
|                | -2  | 4   | 64       | 0.023693 | 199    | 6                     | left preSMA               |
|                | 10  | 2   | 66       | 0.014054 |        | 6                     | right preSMA/SMA          |
|                | 34  | 4   | 56       | 0.018503 | 180    | 6, 8                  | right caudal SFS/MFG      |
|                | 36  | 28  | 2        | 0.024063 | 148    | 47, 13                | right IFG - orb/insula    |
|                | -2  | 18  | 50       | 0.017474 | 123    | 32, 8                 | left dACC                 |
|                | 50  | 32  | 34       | 0.016988 | 66     | 9, 46                 | right mid MFG             |
|                | -36 | 22  | 2        | 0.012921 | 59     | 47, 13                | left IFG - orb/insula     |
|                | 40  | 46  | 28       | 0.014513 | 50     | 46                    | right mid MFG/rostral MFG |
|                | -34 | 22  | 38       | 0.011181 | 32     | 9, 46                 | left mid MFG              |
| 50             | 16  | -4  | 0.011182 | 25       | 45, 47 | right IFG - tria, orb |                           |
| Parietal       | 36  | -54 | 48       | 0.022715 | 160    | 7, 40                 | right IPS/IPL             |
|                | -26 | -64 | 54       | 0.013316 | 151    | 7                     | left SPL/IPS              |
|                | -28 | -68 | 40       | 0.012843 |        | 7                     | left IPS                  |
|                | 12  | -68 | 60       | 0.019802 | 108    | 7                     | right preCuneus           |
|                | -40 | -44 | 50       | 0.018377 | 75     | 40                    | left IPS/IPL              |
| Other          | -58 | -38 | 32       | 0.015509 | 56     | 40                    | left SMG                  |
|                | -46 | -62 | -22      | 0.0169   | 51     | 37                    | left fusiform gyrus       |
|                | 52  | -32 | -2       | 0.011929 | 37     | 21, 22                | right MTG/STG             |
|                | -62 | -40 | -8       | 0.01318  | 34     | 21, 22                | left MTG/STG              |
|                | x   | y   | z        | ALE      | # Vox  | BA                    | Region                    |
| <i>Spatial</i> |     |     |          |          |        |                       |                           |
| Frontal        | -26 | 0   | 58       | 0.028176 | 245    | 6, 8                  | left caudal SFS           |
|                | 28  | 4   | 54       | 0.016202 | 167    | 6, 8                  | right caudal SFS          |
|                | -42 | -2  | 42       | 0.017014 | 110    | 6                     | left preCG                |
|                | -54 | 10  | 36       | 0.013887 | 66     | 9                     | left caudal MFG           |
|                | 2   | 16  | 52       | 0.010963 | 46     | 32, 6                 | right dACC                |
|                | 48  | 8   | 36       | 0.012293 | 41     | 9, 6                  | right IFJ                 |

|               |       |     |     |          |         |        |                          |
|---------------|-------|-----|-----|----------|---------|--------|--------------------------|
| Parietal      | 16    | -60 | 56  | 0.018979 | 583     | 7      | right preCuneus/SPL      |
|               | 28    | -56 | 60  | 0.018248 |         | 7      | right SPL/IPS            |
|               | 4     | -56 | 54  | 0.0179   |         | 7      | right preCuneus          |
|               | 12    | -62 | 60  | 0.01745  |         | 7      | right preCuneus          |
|               | 10    | -60 | 68  | 0.016089 |         | 7      | right preCuneus          |
|               | -20   | -64 | 54  | 0.019694 | 307     | 7      | left SPL/IPS             |
|               | -16   | -60 | 54  | 0.017223 |         | 7      | left preCuneus/SPL       |
|               | -12   | -54 | 48  | 0.013356 |         | 7      | left preCuneus           |
|               | -10   | -52 | 52  | 0.01226  |         | 7      | left preCuneus           |
|               | 40    | -40 | 54  | 0.020638 | 179     | 40     | right IPS/IPL            |
|               | -12   | -72 | 46  | 0.012961 | 90      | 7      | left preCuneus           |
|               | -18   | -74 | 42  | 0.012863 |         | 7      | left preCuneus           |
|               | 24    | -72 | 38  | 0.012851 | 88      | 7, 19  | right IPS                |
|               | 26    | -66 | 38  | 0.012501 |         | 7, 19  | right IPS                |
|               | -34   | -38 | 42  | 0.015995 | 73      | 40     | left IPS/IPL             |
|               | -38   | -48 | 34  | 0.012564 | 49      | 39, 40 | left angular gyrus       |
|               | 28    | -54 | 46  | 0.012548 | 48      | 7      | right IPS                |
|               | 18    | -72 | 52  | 0.01289  | 48      | 7      | right preCuneus          |
|               | -32   | -48 | 60  | 0.010936 | 40      | 7, 40  | left IPS                 |
|               | Other | -45 | -68 | -8       | 0.01642 | 211    | 19, 37                   |
| -48           |       | -58 | -8  | 0.012813 |         | 37     | left fusiform gyrus      |
| -44           |       | -78 | -2  | 0.012733 |         | 19     | left IOG                 |
| -30           |       | -78 | 30  | 0.013258 | 195     | 19     | left MOG                 |
| -34           |       | -84 | 20  | 0.012502 |         | 19     | left MOG                 |
| -38           |       | -74 | 28  | 0.012235 |         | 19     | left MOG                 |
| -6            |       | -21 | -9  | 0.012501 | 48      |        | midbrain                 |
| 0             |       | -87 | -3  | 0.012501 | 48      | 17     | calcarine sulcus         |
| 48            |       | -70 | -2  | 0.012507 | 48      | 19, 37 | right IOG, ITG           |
| 34            |       | -81 | 24  | 0.012501 | 48      | 19     | right MOG                |
| -20           |       | 8   | -6  | 0.011439 | 44      |        | left lentiform           |
|               |       | x   | y   | z        | ALE     | # Vox  | BA                       |
| <i>Object</i> |       |     |     |          |         |        |                          |
| Frontal       | -50   | 12  | 34  | 0.012867 | 86      | 6, 44  | left caudal MFG          |
|               | -38   | 52  | 8   | 0.01355  | 82      | 10, 46 | left rostral MFG         |
|               | -38   | 4   | 54  | 0.012496 | 48      | 6      | left caudal MFG          |
|               | -48   | 22  | 26  | 0.00955  | 33      | 45, 44 | left IFG - tria/oper/IFS |
|               | 38    | 34  | 26  | 0.009107 | 28      | 45, 46 | left IFS/MFG/IFG - tria  |
| Parietal      | -40   | -54 | 52  | 0.012174 | 85      | 40     | left IPS/IPL             |
|               | -58   | -38 | 50  | 0.013502 | 55      | 40     | left IPL                 |

|       |     |     |    |          |    |        |              |
|-------|-----|-----|----|----------|----|--------|--------------|
| Other | -60 | -48 | 10 | 0.012025 | 55 | 21, 22 | left MTG/STG |
|       | -64 | -44 | 0  | 0.010708 | 41 | 21     | left MTG     |

---
