# Supplementary material
Source: PubMed Central journal article supplement (PMC3584956)
Supplement: supp_bhs007_SupplementalTable2.pdf [file supp_bhs007_SupplementalTable2.pdf]

**Supplemental Table 2 – ALE Results by Function**

|                              | x   | y   | z  | ALE      | # Vox | BA         | Region                          |
|------------------------------|-----|-----|----|----------|-------|------------|---------------------------------|
| <i>Distractor Resistance</i> |     |     |    |          |       |            |                                 |
| Frontal                      | 4   | 16  | 52 | 0.01487  | 162   | 32, 6      | right dACC                      |
|                              | -26 | 2   | 58 | 0.015436 | 155   | 6, 8       | left caudal SFS                 |
|                              | -42 | -4  | 44 | 0.01417  | 73    | 6          | left preCG                      |
|                              | -40 | -12 | 50 | 0.009277 |       | 6          | left preCG                      |
|                              | -54 | 10  | 36 | 0.013695 | 55    | 6, 44      | left caudal MFG                 |
|                              | 28  | 16  | 50 | 0.012746 | 45    | 8          | right SFS                       |
|                              | 48  | 6   | 38 | 0.011301 | 35    | 6, 44, 9   | right IFJ                       |
| Parietal                     | 30  | -54 | 60 | 0.014735 | 125   | 7          | right IPS/SPL                   |
|                              | -14 | -64 | 54 | 0.011598 | 88    | 7          | left preCuneus                  |
|                              | -24 | -64 | 56 | 0.011054 |       | 7          | left SPL/IPS                    |
|                              | -8  | -66 | 62 | 0.008738 |       | 7          | left preCuneus                  |
|                              | 4   | -56 | 54 | 0.012517 | 59    | 7          | right preCuneus                 |
|                              | 8   | -60 | 46 | 0.008902 |       | 7          | right preCuneus                 |
|                              | 14  | -68 | 62 | 0.010484 | 50    | 7          | right preCuneus                 |
|                              | 22  | -66 | 58 | 0.008951 |       | 7          | right SPL/IPS                   |
|                              | -32 | -48 | 60 | 0.010952 | 39    | 7, 40      | left IPS                        |
|                              | 32  | -52 | 46 | 0.010125 | 25    | 7, 40      | right IPS                       |
| Other                        | -32 | -82 | 26 | 0.013256 | 65    | 19         | left MOG                        |
|                              | x   | y   | z  | ALE      | # Vox | BA         | Region                          |
| <i>Intrusion Resistance</i>  |     |     |    |          |       |            |                                 |
| Frontal                      | 38  | 28  | 2  | 0.0184   | 108   | 47, 45, 13 | right IFG - orb,<br>tria/insula |
|                              | -38 | 16  | 28 | 0.011126 | 62    | 44, 45     | left IFS/IFG - oper,<br>tria    |
|                              | 30  | 4   | 52 | 0.010935 | 55    | 6, 8       | right caudal SFS                |
|                              | -40 | 2   | 50 | 0.012425 | 52    | 6          | left preCG                      |
|                              | -36 | 22  | 2  | 0.012067 | 48    | 47, 45, 13 | left IFG - orb,<br>tria/insula  |
|                              | 46  | 2   | 48 | 0.009841 | 30    | 6          | right preCG                     |
| Parietal                     | 14  | -56 | 50 | 0.010897 | 42    | 7          | right preCuneus                 |
|                              | -22 | -62 | 48 | 0.009684 | 34    | 7          | left SPL/IPS                    |
| Other                        | 42  | -78 | 0  | 0.010821 | 40    | 19         | right IOG                       |
|                              | x   | y   | z  | ALE      | # Vox | BA         | Region                          |

*Shifting*

|                 |     |     |          |          |        |                      |                             |
|-----------------|-----|-----|----------|----------|--------|----------------------|-----------------------------|
| Frontal         | -48 | 12  | -8       | 0.010856 | 73     | 13                   | left insula                 |
|                 | -54 | 2   | 42       | 0.013657 | 63     | 6                    | left preCG                  |
|                 | -2  | 26  | 34       | 0.010847 | 46     | 32, 24               | left dACC                   |
|                 | -32 | -2  | 58       | 0.009691 | 37     | 6                    | left caudal SFS             |
| Parietal        | -56 | -38 | 48       | 0.020455 | 119    | 40                   | left IPL                    |
|                 | -58 | -38 | 32       | 0.015531 | 92     | 40                   | left SMG                    |
|                 | -38 | -44 | 48       | 0.011409 | 84     | 40                   | left IPL/IPS                |
|                 | 42  | -40 | 50       | 0.01172  | 81     | 40                   | right IPL/IPS               |
|                 | 14  | -66 | 60       | 0.008868 | 26     | 7                    | right preCuneus             |
|                 | 18  | -60 | 58       | 0.008283 |        | 7                    | right preCuneus/SPL         |
| Other           | -64 | -44 | 0        | 0.010915 | 64     | 21, 22               | left MTG/STG                |
|                 | -64 | -38 | -8       | 0.009119 |        | 21                   | left MTG                    |
|                 | -60 | -48 | 10       | 0.011976 | 50     | 21, 22               | left MTG/STG                |
|                 | x   | y   | z        | ALE      | # Vox  | BA                   | Region                      |
| <i>Updating</i> |     |     |          |          |        |                      |                             |
| Frontal         | -50 | 20  | 28       | 0.015994 | 460    | 45, 44               | left IFS/IFG - oper, tria   |
|                 | -46 | -2  | 40       | 0.015237 |        | 6                    | left preCG                  |
|                 | -54 | 14  | 22       | 0.009099 |        | 44                   | left IFG - oper             |
|                 | -30 | 0   | 58       | 0.02073  | 207    | 6, 8                 | left caudal SFS             |
|                 | 48  | 4   | 38       | 0.022787 | 154    | 6, 9, 44             | right IFJ                   |
|                 | 34  | 6   | 56       | 0.018133 | 151    | 6, 8                 | right caudal SFS/caudal MFG |
|                 | -2  | 4   | 62       | 0.013772 | 68     | 6                    | left preSMA/SMA             |
|                 | 6   | 8   | 68       | 0.008606 |        | 6                    | right preSMA                |
|                 | 56  | 12  | 14       | 0.011151 | 37     | 6, 44                | right IFG - oper/preCG      |
|                 | 50  | 36  | 30       | 0.010296 | 30     | 9, 46                | right mid MFG               |
| 50              | 38  | 22  | 0.007904 |          | 45, 46 | right IFS/IFG - tria |                             |
| Parietal        | -40 | -52 | 52       | 0.013397 | 161    | 40                   | left IPL/IPS                |
|                 | -34 | -62 | 54       | 0.010273 |        | 7                    | left IPS                    |
|                 | 12  | -66 | 60       | 0.013552 | 106    | 7                    | right preCuneus             |
|                 | -10 | -56 | 48       | 0.012913 | 104    | 7                    | left preCuneus              |
|                 | -18 | -58 | 54       | 0.009739 |        | 7                    | left preCuneus/SPL          |
|                 | 36  | -54 | 46       | 0.012942 | 94     | 40, 7                | right IPS                   |
|                 | 40  | -42 | 54       | 0.009886 | 28     | 40                   | right IPL/IPS               |
|                 | -12 | -72 | 62       | 0.010138 | 26     | 7                    | left preCunues              |
| Other           | -44 | -70 | -8       | 0.014989 | 102    | 19, 37               | left fusiform gyrus         |
|                 | -10 | -24 | -12      | 0.01142  | 64     |                      | midbrain                    |
